# Supplementary material for: A room-temperature gas sensor based on 2D Ni–Co–Zn ternary oxide nanoflakes for selective and sensitive ammonia detection
Source: Royal Society of Chemistry journal article supplement (doi:10.1039/d3dt02751a), 2023-01-01
Supplement: d3dt02751a1.pdf [file d3dt02751a1.pdf]

## Supplementary Information

### **Room-temperature gas sensor based on 2D Zn-Ni-Co ternary oxide nanoflakes for selective and sensitive ammonia detection**

Sourav Karmakar <sup>1</sup>, Avik Sett <sup>2</sup>, Palash Chandra Maity <sup>3</sup>, Gairik Karmakar<sup>2</sup>, Rinky Sha <sup>1\*</sup>, & Tarun Kanti Bhattacharyya <sup>2</sup>, Indranil Lahiri <sup>3</sup>

<sup>1</sup>Sensors for Health-care and Environmental monitoring (SHE) Lab, Department of Electronics and Communication Engineering, Indian Institute of Information Technology Kalyani, West Bengal 741235, India <sup>2</sup>Department of Electronics and Electrical communications Engineering, Indian Institute of Technology Kharagpur, West Bengal 721302, India <sup>3</sup>Department of Metallurgical and Materials Engineering, Indian Institute of Technology Roorkee, Uttarakhand 247667, India.

(\* Corresponding author's email: [rinky@iiitkalyani.ac.in](mailto:rinky@iiitkalyani.ac.in))

#### **XRD Analysis**

The crystallographic phase of 2D NiCo<sub>2</sub>ZnO<sub>4</sub> nanoflakes was investigated by XRD pattern as shown in **Fig. S1**. The XRD peaks of 2D NiCo<sub>2</sub>ZnO<sub>4</sub> nanoflakes samples are appeared at 2 $\theta$ =18.2<sup>o</sup>, 30.8<sup>o</sup>, 36.4<sup>o</sup>, 38.1<sup>o</sup>, 44.5<sup>o</sup>, 48.8<sup>o</sup>, 58.67<sup>o</sup>, 73.7<sup>o</sup>, 77.1<sup>o</sup> and corresponding planes are (111), (220), (311), (222), (400), (422), (440), (620), and (533) respectively. The appeared XRD pattern is similar to NiCo<sub>2</sub>O<sub>4</sub> peak, a slight peak shift is observed due to the substitution of the Zn inside the NiCo<sub>2</sub>O<sub>4</sub> crystal structure [1].

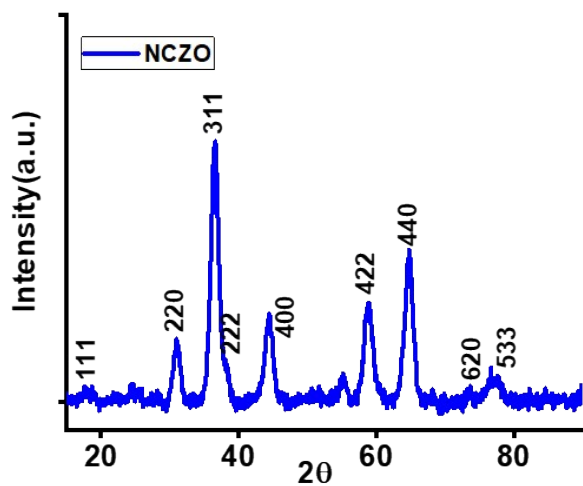

**Fig. S1:** XRD pattern of the 2D NiCo<sub>2</sub>ZnO<sub>4</sub> nanoflakes

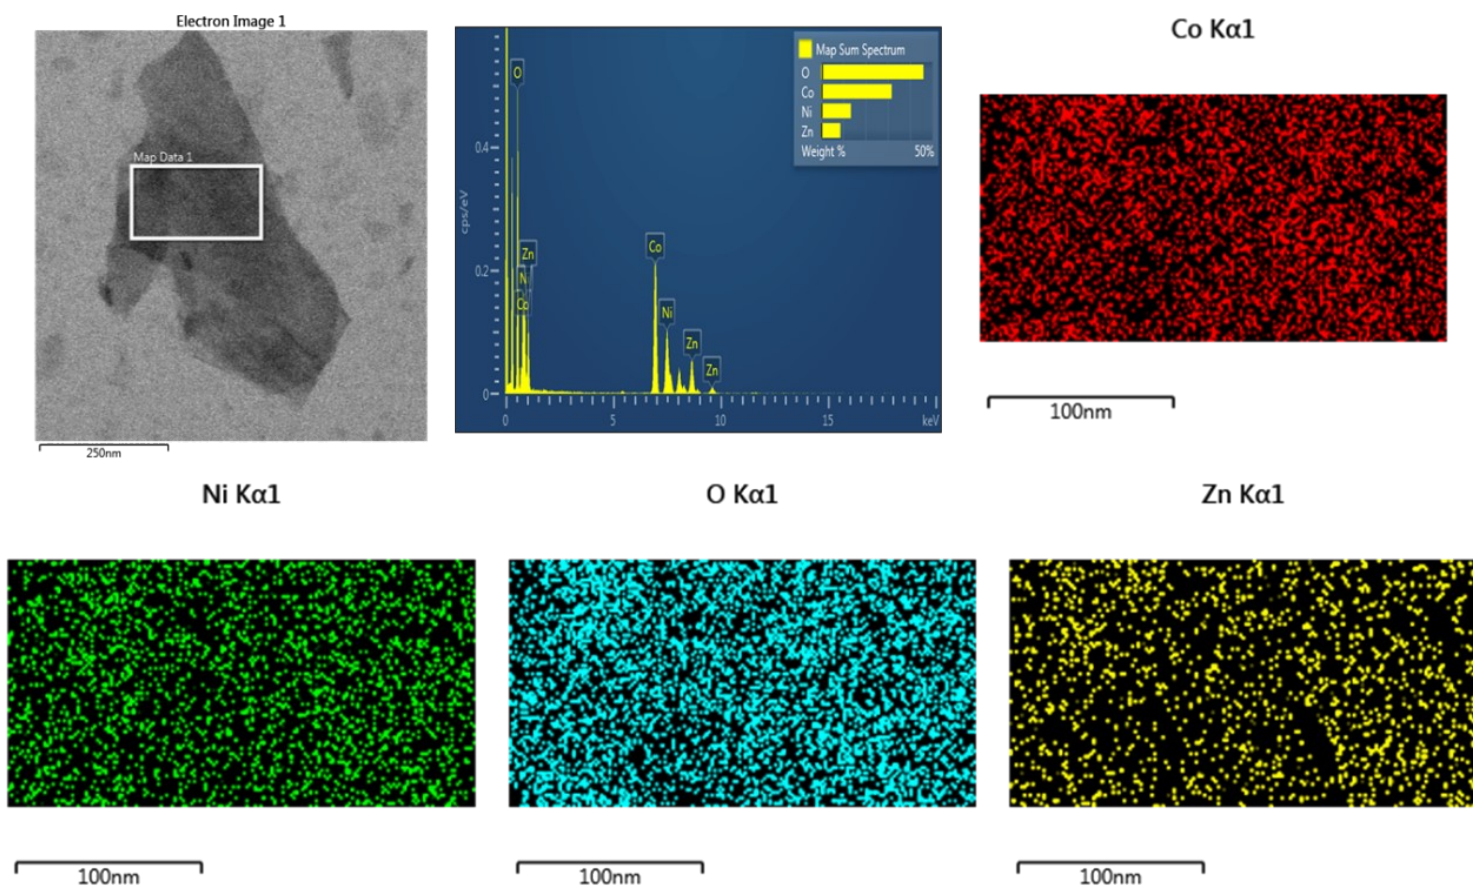

**Fig. S2.** EDX spectrum and elemental mapping of the 2D NiCo<sub>2</sub>ZnO<sub>4</sub> nanoflakes obtained from TEM image

## XPS analysis

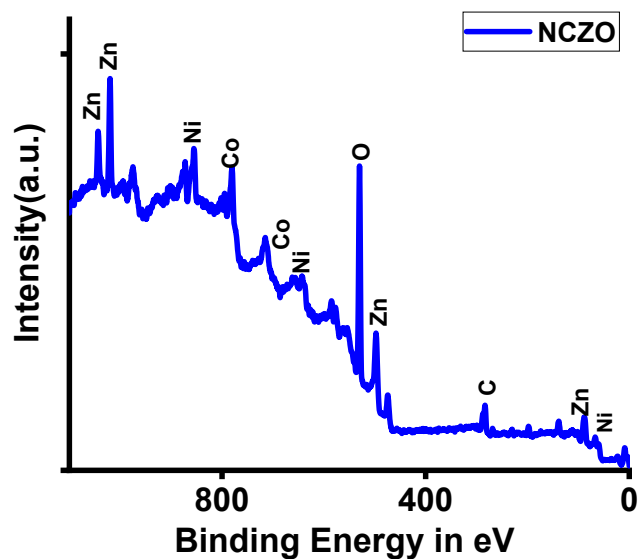

Fig. S3. XPS survey spectra of the 2D NiCo<sub>2</sub>ZnO<sub>4</sub> (NCZO) nanoflakes

## References

1. Li, L., Zhang, Y., Shi, F., Zhang, Y., Zhang, J., Gu, C., ... & Tu, J. (2014). Spinel manganese–nickel–cobalt ternary oxide nanowire array for high-performance electrochemical capacitor applications. *ACS applied materials & interfaces*, 6(20), 18040-18047.
